# Supplementary material for: Size-Dependent Nonlinear Optical Properties of Gd2O2S:Tb3+ Scintillators and Their Doped Gel Glasses
Source: MDPI journal article supplement (doi:10.3390/molecules27010085), 2021-12-24
Supplement: s1 [file s1]

# Size-dependent nonlinear optical properties of $\text{Gd}_2\text{O}_2\text{S}:\text{Tb}^{3+}$ scintillators and their doped gel glasses

Long Chen<sup>1,2,†</sup>, Cuiyu Wu<sup>1,2,†</sup>, Zheng Xie<sup>1</sup>, Chenghua Sun<sup>1,\*</sup>, Shuyun Zhou<sup>1,\*</sup>

<sup>1</sup> Key Laboratory of Photochemical Conversion and Optoelectronic Materials, Technical Institute of Physics and Chemistry, Chinese Academy of Sciences, Beijing, 100190, China.

<sup>2</sup> University of Chinese Academy of Sciences, Beijing 100049, China

\* Corresponding author: sunchenghua@mail.ipc.ac.cn,  
zhou\_shuyun@mail.ipc.ac.cn

† These authors contributed equally to this work.

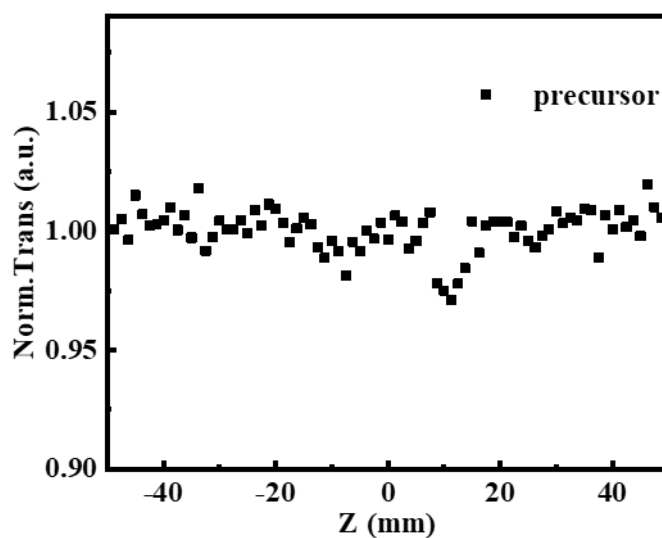

**Figure S1.** Z-scan data of precursor  $\text{Gd}_2\text{O}(\text{CO}_3)_2 \cdot \text{H}_2\text{O} : \text{Tb}^{3+}$ .

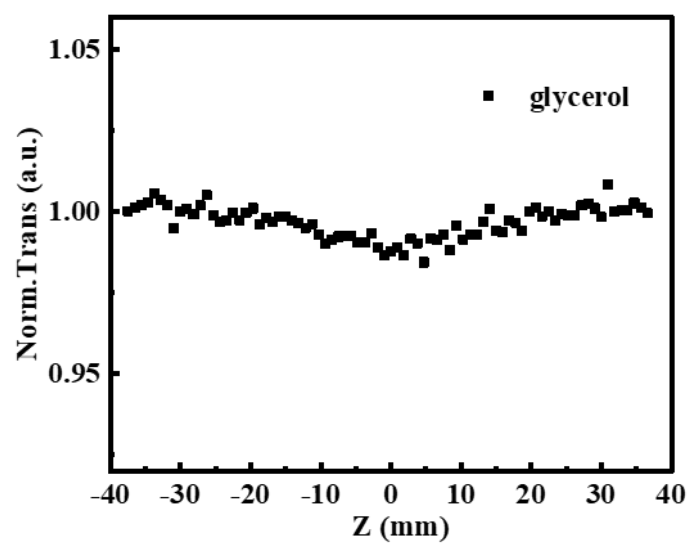

**Figure S2.** Z-scan data of glycerol.

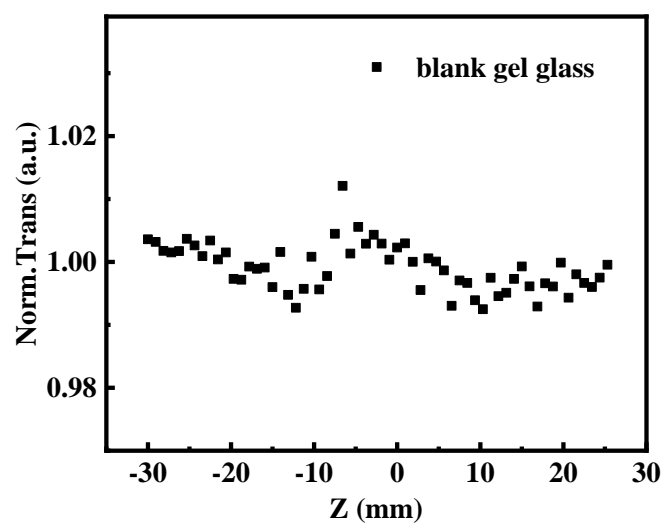

**Figure S3.** Z-scan data of blank gel glass.

**Table S1.** The onset limiting threshold and limiting threshold of GOS.

| samples          | $\lambda$ (nm) | $F_{ON}$              | $F_{OL}$              |
|------------------|----------------|-----------------------|-----------------------|
|                  |                | (J·cm <sup>-2</sup> ) | (J·cm <sup>-2</sup> ) |
| GOS-11 $\mu$ m   |                | 0.99                  | 2.17                  |
| GOS-1 $\mu$ m    | 532            | 1.43                  | 2.90                  |
| GOS-0.45 $\mu$ m |                | 1.69                  | 3.53                  |
| GOS-11 $\mu$ m   |                | 2.8                   | 4.18                  |
| GOS-1 $\mu$ m    | 1064           | 3.98                  | 5.59                  |
| GOS-0.45 $\mu$ m |                | 4.46                  | 5.59                  |

**Table S2.** Comparison of optical limiting properties of different materials and particle sizes.

| Material                                                              | size                            | Solvent/M<br>atrices | laser<br>parameters | $F_{ON}$ (J/cm <sup>2</sup> ) | $F_{OL}$ (J/cm <sup>2</sup> ) | literature |
|-----------------------------------------------------------------------|---------------------------------|----------------------|---------------------|-------------------------------|-------------------------------|------------|
| WS <sub>4</sub> Cu <sub>4</sub> Cl <sub>2</sub> (<br>py) <sub>6</sub> |                                 | DMF                  | 532 nm<br>8 ns      |                               | 0.10                          | [22]       |
| TiS <sub>2</sub><br>nanosheet                                         | 350 nm                          | PMMA<br>glasses      | 532 nm<br>7 ns      | 0.067                         | 0.8                           | [10]       |
| Sb<br>nanosheet                                                       | Several<br>hundred<br>naometers | isopropyl<br>alcoho  | 532 nm<br>1.8 ns    | 0.162                         | 1.37                          | [23]       |
| Graphene                                                              | A few<br>micrometers            | NMP                  | 532 nm<br>6 ns      | 0.44                          | 15.15                         | [24]       |
| Graphene<br>-Ormosil                                                  |                                 | gel<br>glasses       | 532 nm<br>6 ns      | 0.03                          |                               | [25]       |
|                                                                       | 0.45 $\mu$ m                    |                      |                     | 1.69                          | 3.53                          |            |
| GOS                                                                   | 1 $\mu$ m                       | glycerol             | 532 nm<br>10 ns     | 1.43                          | 2.90                          | This work  |
|                                                                       | 11 $\mu$ m                      |                      |                     | 0.99                          | 2.17                          |            |

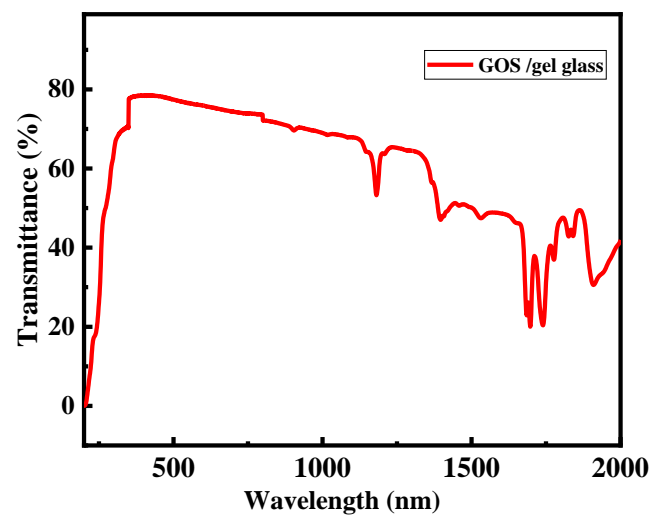

**Figure S4.** Transmission spectra of GOS /gel glass.
